# Supplementary material for: Application of blended learning approach in clinical skills to stimulate active learning attitudes and improve clinical practice among medical students
Source: PeerJ. 2021 Jun 24;9:e11690. doi: 10.7717/peerj.11690 (PMC8236236; doi:10.7717/peerj.11690)
Supplement: Supplemental Information 1 [file peerj-09-11690-s001.xlsx]

## Sheet: Sheet1
Group	Theoretical score	CPR	Pelvic examination	Physical examination of children	Urethral catheterization	Lumbar puncture
Experimental group	95	96	84	92	71	98
Experimental group	96	90	88	92	76	84
Experimental group	98	81	80	95	60	91
Experimental group	93	79	86	90	74	97
Experimental group	92	94	91	93	75	91
Experimental group	89	89	90	90	60	91
Experimental group	87	98.5	89	95	68	87
Experimental group	98	98	81	95	60	92
Experimental group	93	90	78	99	68	91
Experimental group	98	88	77	80	78	89
Experimental group	62	96	83	97	77	90
Experimental group	97.5	91	78	93	74	93
Experimental group	95	92	88	98	80	94
Experimental group	95	84	86	91	73	77
Experimental group	72	99	94	94	81	88
Experimental group	79	92	85	90	75	87
Experimental group	87	93	87	89	71	82
Experimental group	99	87	84	96	75	96
Experimental group	95	96	84	89	60	98
Experimental group	88	96.5	87	95	69	92
Experimental group	75	92	88	77	65	85
Experimental group	96	95	91	89	66	86
Experimental group	90	97	84	94	60	90
Experimental group	81	83	84	94	66	93
Experimental group	80	85.5	82	90	82	72
Experimental group	84	77	75	91	76	84
Experimental group	75	90	81	86	65	100
Experimental group	93	88	85	95	64	94
Experimental group	80	83	87	86	66	96
Experimental group	90.5	81.5	82	86	65	95
Experimental group	75	95	77	84	71	88
Experimental group	82	93	90	80	67	95
Experimental group	92	90	85	98	63	81
Experimental group	68	88	82	95	69	96
Experimental group	93	86	90	97	63	81
Experimental group	70	91	84	89	61	79
Experimental group	97	98	89	92	67	93
Experimental group	83	96	87	87	61	90
Experimental group	91	83	80	99	63	78
Experimental group	81	80.5	93	96	71	78
Experimental group	67	84	83	89	48	86
Experimental group	83	90	78	87	60	89
Experimental group	94	92	85	72	79	84
Experimental group	80	89	83	85	72	91
Experimental group	71	90	83	90	64	87
Experimental group	97	82.5	82	97	61	55
Experimental group	86	82	80	91	62	83
Experimental group	79	96	86	93	69	82
Experimental group	90	96	90	91	60	67
Experimental group	89	98	87	93	63	89
Experimental group	89	83	75	74	67	90
Experimental group	90	96	93	92	84	51
Experimental group	67	92	86	80	60	84
Experimental group	94	95	81	99	73	94
Experimental group	93	99	83	89	64	92
Experimental group	82	94	88	96	61	88
Experimental group	93	83	89	98	60	92
Experimental group	67	93	94	85	85	61
Experimental group	95	96	83	88	70	89
Experimental group	61	98	85	93	72	87
Experimental group	89	95	93	81	86	88
Experimental group	83	90	87	86	67	96
Experimental group	60	88	82	92	62	93
Experimental group	82	85	83	81	68	84
Experimental group	97	74	66	72	63	88
Experimental group	93	74	85	95	81	95
Experimental group	83	86	80	90	68	88
Experimental group	98	87	76	74	81	93
Experimental group	74	95	77	95	75	87
Experimental group	80	80	82	90	76	100
Experimental group	88	78	80	83	67	98
Experimental group	66	80	79	94	64	95
Experimental group	67	98	85	90	60	89
Experimental group	89.5	75	71	76	69	75
Experimental group	64	85	84	92	71	99
Experimental group	94	85	61	99	65	70
Experimental group	86	88	82	91	67	80
Experimental group	79	94	87	93	73	84
Experimental group	74	89	87	94	72	91
Experimental group	84	89	78	87	67	55
Experimental group	70	83	90	90	67	80
Experimental group	98	92	85	99	83	94
Experimental group	88	91	81	73	81	87
Experimental group	69	91	80	84	72	87
Experimental group	78	89	86	91	69	95
Experimental group	80	98	91	97	90	87
Experimental group	87	86	74	78	68	87
Experimental group	95	72	67	93	72	90
Experimental group	77	88	72	78	61	84
Experimental group	83	92.5	86	86	71	86
Experimental group	78	79.5	83	90	82	68
Experimental group	86	87	72	80	60	89
Experimental group	86	97	91	90	65	86
Experimental group	94	83	82	77	65	98
Experimental group	74	80	78	95	62	89
Experimental group	71	88	82	90	60	84
Experimental group	78	85	86	89	84	60
Experimental group	73	96	81	79	60	87
Experimental group	72	86	85	83	76	61
Experimental group	86	91	79	94	65	94
Control group	92	79	84	85	76	60
Control group	76	88	78	97	58	81
Control group	95	94	80	71	60	93
Control group	73	85	86	99	73	88
Control group	64	93	84	88	71	53
Control group	62	91	71	95	60	92
Control group	78	88	84	71	61	95
Control group	60	88	88	80	62	57
Control group	74	86	88	91	67	89
Control group	68	72	87	77	76	60
Control group	87	73	78	94	65	100
Control group	81	71	81	83	72	96
Control group	85	89	84	98	73	87
Control group	93	66.5	79	78	63	94
Control group	81	87	87	82	70	85
Control group	95	52	62	90	66	65
Control group	85	91	81	74	70	90
Control group	77.5	91	60	80	62	90
Control group	89	75	81	96	66	78
Control group	76	92	84	94	70	89
Control group	90	91	87	96	72	78
Control group	86	90	82	75	62	93
Control group	82	94	80	71	77	94
Control group	87	72	82	90	60	97
Control group	72	98	81	78	66	83
Control group	76	82	70	85	70	74
Control group	80	82	75	81	69	84
Control group	85	98	75	88	65	87
Control group	88	90	92	76	61	96
Control group	92	88	78	69	62	92
Control group	80	93	86	90	82	52
Control group	83	84	81	85	62	89
Control group	77	66	79	78	76	94
Control group	64	81	80	78	60	90
Control group	86	83	81	96	83	81
Control group	68	90	79	75	71	85
Control group	82	85	85	87	62	98
Control group	78	97	87	87	60	87
Control group	72	90	67	69	66	82
Control group	73	86	84	98	60	81
Control group	85	89	83	86	74	96
Control group	60	90	72	88	57	92
Control group	82	84	83	92	70	88
Control group	87	81	82	85	69	71
Control group	77	64	60	94	64	92
Control group	90	74	72	74	61	88
Control group	83	77	70	74	64	83
Control group	89.5	71	64	74	61	68
Control group	73	95	77	83	60	62
Control group	71	97	81	70	40	95
Control group	83	70.5	60	76	75	72
Control group	77	78	80	99	72	93
Control group	71	88	82	92	68	70
Control group	62	87	77	83	71	83
Control group	84	95	85	94	65	92
Control group	97	91	60	73	84	84
Control group	73	71	80	91	54	95
Control group	69	94	83	87	68	79
Control group	78	80	80	92	64	80
Control group	88	69	68	63	60	82
Control group	75	89	81	83	66	93
Control group	85	86	80	83	60	83
Control group	66	75.5	80	84	60	89
Control group	78	75	79	83	83	93
Control group	77	76	62	72	63	87
Control group	67	83	73	85	60	100
Control group	63	84	74	91	63	96
Control group	69	78	61	94	66	23
Control group	90	85	74	74	61	87
Control group	79	76.5	80	72	67	97
Control group	77	82.5	80	94	76	65
Control group	62	90	82	87	61	81
Control group	86	94	77	82	63	82
Control group	75	66.5	82	89	60	62
Control group	63	89	69	73	61	82
Control group	72	83	74	91	61	87
Control group	75	91	77	80	60	86
Control group	89	84	76	85	73	83
Control group	59	70	70	81	65	90
Control group	80	89	76	64	61	83
Control group	83	72.5	87	70	65	98
Control group	85	92	82	70	68	83
Control group	89	80.5	69	90	60	65
Control group	84	75	93	78	50	85
Control group	84	91	75	72	61	85
Control group	80	86	83	94	60	96
Control group	78	60.5	72	83	63	83
Control group	62	86	80	90	63	86
Control group	82	78.5	65	80	76	47
Control group	64	74	68	89	66	38
Control group	93	60.5	83	85	74	52
Control group	60	63.5	66	90	60	91
Control group	77	80	64	78	61	84
Control group	66	89	74	82	60	82
Control group	80	92	75	85	61	85
Control group	87	88	82	85	66	69
Control group	69	90	75	82	62	84
Control group	65	84	75	79	60	65
Control group	70	77	69	83	61	60
Control group	68	82	83	84	60	90
