# Supplementary material for: Application of blended learning approach in clinical skills to stimulate active learning attitudes and improve clinical practice among medical students
Source: PeerJ. 2021 Jun 24;9:e11690. doi: 10.7717/peerj.11690 (PMC8236236; doi:10.7717/peerj.11690)
Supplement: Supplemental Information 4 [file peerj-09-11690-s004.xlsx]

## Sheet: Sheet1
Group	Gender	Age	Discipline	Grade	Examination scores in medical school	Question1	Question2	Question3	Question4	Question5
Experimental group	Female	22	clinical medicine	4	94.03	4	4	4	4	4
Experimental group	Male	21	clinical medicine	4	93.78	4	3	3	3	4
Experimental group	Male	22	clinical medicine	4	92.9	4	4	3	3	3
Experimental group	Male	22	clinical medicine	4	92.77	4	4	4	4	3
Experimental group	Male	22	clinical medicine	4	92.45	4	4	3	3	2
Experimental group	Male	21	clinical medicine	4	91.67	4	4	4	4	4
Experimental group	Male	22	clinical medicine	4	90.84	4	3	4	4	4
Experimental group	Male	22	clinical medicine	4	90.8	4	4	4	4	3
Experimental group	Male	22	clinical medicine	4	90.64	4	3	3	3	3
Experimental group	Male	22	clinical medicine	4	90.52	4	4	4	4	4
Experimental group	Male	22	clinical medicine	4	90.41	4	3	2	2	2
Experimental group	Male	23	clinical medicine	4	90.16	4	4	4	4	4
Experimental group	Male	22	clinical medicine	4	90.03	2	2	3	3	2
Experimental group	Male	22	clinical medicine	4	90.03	4	4	3	3	3
Experimental group	Male	22	clinical medicine	4	89.86	4	4	4	4	3
Experimental group	Female	22	clinical medicine	4	89.67	2	2	2	2	3
Experimental group	Female	22	clinical medicine	4	89.45	4	4	4	4	4
Experimental group	Female	22	clinical medicine	4	89.35	4	3	3	3	3
Experimental group	Female	22	clinical medicine	4	89.22	4	3	4	4	4
Experimental group	Female	22	clinical medicine	4	89.2	4	4	4	4	4
Experimental group	Female	22	clinical medicine	4	89.17	4	4	4	4	4
Experimental group	Female	22	clinical medicine	4	89.14	4	4	4	4	4
Experimental group	Female	22	clinical medicine	4	89.12	4	3	3	3	3
Experimental group	Female	22	clinical medicine	4	89.03	4	3	3	3	3
Experimental group	Male	22	clinical medicine	4	88.89	4	4	4	4	4
Experimental group	Female	22	clinical medicine	4	88.51	4	4	4	4	4
Experimental group	Male	22	clinical medicine	4	88.32	4	4	4	4	4
Experimental group	Female	22	clinical medicine	4	88.29	4	3	3	3	4
Experimental group	Male	22	clinical medicine	4	88.13	4	4	3	3	4
Experimental group	Female	23	clinical medicine	4	88.09	4	4	4	4	4
Experimental group	Male	22	clinical medicine	4	87.51	4	3	3	3	4
Experimental group	Female	22	clinical medicine	4	87.27	3	3	3	3	3
Experimental group	Male	22	clinical medicine	4	87.2	3	3	4	2	2
Experimental group	Female	22	clinical medicine	4	87.12	3	2	4	2	2
Experimental group	Male	22	clinical medicine	4	87.08	4	4	4	4	4
Experimental group	Female	22	clinical medicine	4	87.04	4	4	4	4	4
Experimental group	Male	22	clinical medicine	4	86.89	3	2	2	2	2
Experimental group	Female	22	clinical medicine	4	86.84	3	3	4	4	3
Experimental group	Male	21	clinical medicine	4	86.75	4	4	4	4	4
Experimental group	Female	22	clinical medicine	4	86.68	4	4	4	4	4
Experimental group	Female	22	clinical medicine	4	86.47	4	4	4	4	4
Experimental group	Female	22	clinical medicine	4	86.19	4	4	4	4	4
Experimental group	Female	22	clinical medicine	4	86.17	4	3	3	3	4
Experimental group	Female	22	clinical medicine	4	85.86	4	4	4	4	4
Experimental group	Male	22	clinical medicine	4	85.77	4	4	4	4	4
Experimental group	Male	22	clinical medicine	4	85.49	4	4	4	4	4
Experimental group	Male	22	clinical medicine	4	85.43	3	3	3	3	3
Experimental group	Male	22	clinical medicine	4	85.26	3	2	2	2	2
Experimental group	Male	23	clinical medicine	4	85.26	3	2	2	2	2
Experimental group	Male	22	clinical medicine	4	85.23	4	4	4	4	4
Experimental group	Male	22	clinical medicine	4	85.19	4	4	4	4	4
Experimental group	Male	22	clinical medicine	4	85.18	4	4	4	4	4
Experimental group	Male	22	clinical medicine	4	85.17	4	2	2	2	3
Experimental group	Male	22	clinical medicine	4	85.03	3	3	3	3	3
Experimental group	Male	22	clinical medicine	4	84.6	4	4	4	4	4
Experimental group	Male	22	clinical medicine	4	84.55	4	4	4	4	4
Experimental group	Female	22	clinical medicine	4	84.53	3	3	3	3	3
Experimental group	Female	22	clinical medicine	4	84.44	3	3	2	2	4
Experimental group	Male	21	clinical medicine	4	84.41	3	3	2	2	2
Experimental group	Female	22	clinical medicine	4	84.37	4	4	4	4	4
Experimental group	Female	22	clinical medicine	4	84.32	4	4	4	4	4
Experimental group	Male	22	clinical medicine	4	84.11	4	4	4	4	4
Experimental group	Female	22	clinical medicine	4	84.09	4	4	4	4	4
Experimental group	Female	22	clinical medicine	4	83.99	4	4	4	4	4
Experimental group	Male	22	clinical medicine	4	83.97	4	4	4	4	4
Experimental group	Female	22	clinical medicine	4	83.93	4	4	4	4	4
Experimental group	Female	22	clinical medicine	4	83.92	4	4	4	4	4
Experimental group	Male	22	clinical medicine	4	83.66	4	4	4	4	4
Experimental group	Female	23	clinical medicine	4	83.58	3	3	3	3	2
Experimental group	Female	22	clinical medicine	4	83.48	3	3	3	3	2
Experimental group	Male	22	clinical medicine	4	83.43	3	3	3	3	2
Experimental group	Female	22	clinical medicine	4	83.42	4	4	3	3	2
Experimental group	Female	22	clinical medicine	4	83.26	3	3	3	3	3
Experimental group	Female	22	clinical medicine	4	83.05	4	4	3	3	3
Experimental group	Female	22	clinical medicine	4	82.91	3	3	3	3	3
Experimental group	Female	22	clinical medicine	4	82.78	3	3	3	3	3
Experimental group	Female	22	clinical medicine	4	82.67	4	4	3	3	3
Experimental group	Female	23	clinical medicine	4	82.54	3	3	3	3	3
Experimental group	Female	21	clinical medicine	4	82.36	3	3	3	3	3
Experimental group	Female	22	clinical medicine	4	82.32	3	3	3	3	3
Experimental group	Female	22	clinical medicine	4	82.04	3	3	3	3	3
Experimental group	Female	22	clinical medicine	4	81.85	3	3	3	3	3
Experimental group	Female	22	clinical medicine	4	81.8	3	3	3	3	4
Experimental group	Female	22	clinical medicine	4	81.75	3	3	4	4	3
Experimental group	Female	22	clinical medicine	4	81.45	3	3	4	4	3
Experimental group	Female	22	clinical medicine	4	81.32	3	3	4	4	3
Experimental group	Female	21	clinical medicine	4	81.25	3	3	4	4	3
Experimental group	Female	23	clinical medicine	4	81.22	3	3	4	4	3
Experimental group	Female	22	clinical medicine	4	81.11	3	3	4	4	4
Experimental group	Male	22	clinical medicine	4	80.61	4	3	4	4	4
Experimental group	Male	22	clinical medicine	4	80.32	4	3	4	4	4
Experimental group	Male	22	clinical medicine	4	80.05	4	4	4	4	4
Experimental group	Male	22	clinical medicine	4	80.02	4	4	4	4	4
Experimental group	Male	22	clinical medicine	4	79.79	4	4	4	4	4
Experimental group	Male	22	clinical medicine	4	79.6	4	4	4	4	4
Experimental group	Male	22	clinical medicine	4	79.5	4	4	4	4	4
Experimental group	Male	22	clinical medicine	4	79.37	4	4	4	4	4
Experimental group	Male	22	clinical medicine	4	79.06	4	4	4	4	4
Experimental group	Male	22	clinical medicine	4	78.95	4	4	4	4	4
Experimental group	Male	22	clinical medicine	4	78.85	4	4	4	4	4
Control group	Female	22	clinical medicine	4	92.81	3	2	2	2	4
Control group	Male	21	clinical medicine	4	92.56	3	2	2	2	4
Control group	Male	22	clinical medicine	4	92.2	3	2	2	2	3
Control group	Male	22	clinical medicine	4	91.47	3	2	3	4	3
Control group	Male	22	clinical medicine	4	90.39	3	2	3	3	2
Control group	Male	21	clinical medicine	4	90.36	3	2	3	4	4
Control group	Male	22	clinical medicine	4	90.21	3	3	3	3	4
Control group	Male	22	clinical medicine	4	90.2	3	3	3	3	2
Control group	Male	22	clinical medicine	4	90.05	3	3	3	3	2
Control group	Male	22	clinical medicine	4	89.52	3	2	3	4	2
Control group	Male	22	clinical medicine	4	89.49	3	3	2	2	2
Control group	Male	23	clinical medicine	4	89.22	3	2	2	2	3
Control group	Male	22	clinical medicine	4	89.19	3	2	2	2	2
Control group	Male	22	clinical medicine	4	89.02	3	2	2	2	3
Control group	Male	22	clinical medicine	4	88.82	4	2	1	1	2
Control group	Female	22	clinical medicine	4	88.68	2	2	2	2	2
Control group	Female	21	clinical medicine	4	88.62	2	4	2	2	2
Control group	Female	22	clinical medicine	4	88.54	2	3	3	3	3
Control group	Female	22	clinical medicine	4	88.23	3	3	3	3	4
Control group	Female	22	clinical medicine	4	88.01	2	4	3	3	4
Control group	Male	22	clinical medicine	4	87.99	3	1	3	3	4
Control group	Female	22	clinical medicine	4	87.78	2	4	4	4	4
Control group	Female	22	clinical medicine	4	87.76	2	3	3	3	3
Control group	Female	22	clinical medicine	4	87.69	4	3	3	3	3
Control group	Male	22	clinical medicine	4	87.61	4	3	3	3	3
Control group	Female	22	clinical medicine	4	87.48	3	3	3	3	3
Control group	Male	22	clinical medicine	4	87.38	3	3	3	3	3
Control group	Female	22	clinical medicine	4	87.35	3	3	3	3	4
Control group	Male	22	clinical medicine	4	87.22	3	4	3	3	4
Control group	Female	23	clinical medicine	4	87.03	3	4	4	4	2
Control group	Male	22	clinical medicine	4	87	3	3	3	3	2
Control group	Female	22	clinical medicine	4	86.97	3	3	3	3	3
Control group	Male	22	clinical medicine	4	86.9	3	3	2	2	2
Control group	Female	22	clinical medicine	4	86.88	3	2	2	2	2
Control group	Male	22	clinical medicine	4	86.88	3	2	1	1	4
Control group	Female	22	clinical medicine	4	86.72	3	2	1	1	2
Control group	Male	22	clinical medicine	4	86.62	3	2	2	2	2
Control group	Female	22	clinical medicine	4	86.6	3	3	4	4	3
Control group	Male	21	clinical medicine	4	86.55	3	4	4	4	4
Control group	Female	22	clinical medicine	4	86.32	4	4	3	3	3
Control group	Female	22	clinical medicine	4	86.3	4	4	3	3	4
Control group	Female	22	clinical medicine	4	86.27	3	4	3	3	4
Control group	Female	22	clinical medicine	4	86.25	4	3	3	3	3
Control group	Female	22	clinical medicine	4	86	4	4	4	4	3
Control group	Male	22	clinical medicine	4	85.86	3	3	4	4	3
Control group	Male	22	clinical medicine	4	85.85	2	3	4	4	4
Control group	Male	22	clinical medicine	4	85.75	4	3	3	3	3
Control group	Male	22	clinical medicine	4	85.64	4	2	2	2	2
Control group	Male	23	clinical medicine	4	85.48	3	2	2	2	2
Control group	Male	22	clinical medicine	4	85.35	3	4	3	4	4
Control group	Male	22	clinical medicine	4	85.23	3	4	3	4	4
Control group	Male	22	clinical medicine	4	85.14	4	4	3	4	4
Control group	Male	22	clinical medicine	4	85.07	3	2	2	2	3
Control group	Male	22	clinical medicine	4	84.95	4	3	3	3	3
Control group	Male	22	clinical medicine	4	84.78	3	4	3	4	4
Control group	Male	22	clinical medicine	4	84.54	3	4	4	4	4
Control group	Female	22	clinical medicine	4	84.49	4	3	3	3	3
Control group	Female	22	clinical medicine	4	83.91	3	3	2	2	2
Control group	Male	21	clinical medicine	4	83.57	3	3	2	2	2
Control group	Female	22	clinical medicine	4	83.56	3	4	4	4	4
Control group	Female	22	clinical medicine	4	83.46	3	4	4	4	3
Control group	Male	22	clinical medicine	4	83.44	3	4	4	4	3
Control group	Female	22	clinical medicine	4	82.98	3	3	3	3	3
Control group	Female	22	clinical medicine	4	82.89	3	3	3	3	4
Control group	Male	22	clinical medicine	4	82.57	3	2	3	3	4
Control group	Female	22	clinical medicine	4	82.41	3	3	2	4	4
Control group	Female	22	clinical medicine	4	82.39	3	4	2	4	3
Control group	Male	22	clinical medicine	4	82.34	3	4	4	4	3
Control group	Female	23	clinical medicine	4	82.04	3	3	3	3	2
Control group	Female	22	clinical medicine	4	81.92	4	3	3	3	2
Control group	Male	22	clinical medicine	4	81.87	4	3	3	3	2
Control group	Female	22	clinical medicine	4	81.86	4	4	3	3	2
Control group	Female	23	clinical medicine	4	81.79	4	3	3	3	3
Control group	Female	22	clinical medicine	4	81.65	3	4	3	3	3
Control group	Female	22	clinical medicine	4	81.56	4	3	3	3	3
Control group	Female	22	clinical medicine	4	81.47	4	3	3	3	3
Control group	Female	22	clinical medicine	4	81.21	3	4	3	3	3
Control group	Female	23	clinical medicine	4	80.89	4	3	3	3	3
Control group	Female	21	clinical medicine	4	80.8	3	3	3	3	2
Control group	Female	22	clinical medicine	4	80.33	4	3	2	2	2
Control group	Female	22	clinical medicine	4	80.2	2	3	2	2	2
Control group	Female	22	clinical medicine	4	80.12	2	3	3	3	3
Control group	Female	22	clinical medicine	4	79.85	2	3	3	3	4
Control group	Female	22	clinical medicine	4	79.85	2	3	4	4	3
Control group	Female	22	clinical medicine	4	79.8	3	3	4	4	3
Control group	Female	22	clinical medicine	4	79.73	3	3	4	4	3
Control group	Female	21	clinical medicine	4	79.13	3	3	4	3	3
Control group	Female	23	clinical medicine	4	78.53	3	3	3	3	3
Control group	Female	22	clinical medicine	4	78.36	3	3	3	3	4
Control group	Male	22	clinical medicine	4	78.35	3	3	3	3	3
Control group	Male	22	clinical medicine	4	78.33	4	3	3	4	3
Control group	Male	22	clinical medicine	4	78.29	4	4	3	4	3
Control group	Male	22	clinical medicine	4	78.07	4	4	3	4	3
Control group	Male	22	clinical medicine	4	77.93	4	4	3	4	3
Control group	Male	22	clinical medicine	4	77.76	4	3	3	4	4
Control group	Male	22	clinical medicine	4	77.58	4	3	4	4	4
Control group	Male	22	clinical medicine	4	77.3	3	3	4	4	4
Control group	Male	22	clinical medicine	4	77.03	3	4	2	3	2
Control group	Male	22	clinical medicine	4	76.88	3	2	2	3	4
Control group	Male	21	clinical medicine	4	76.31	3	2	2	4	2
